# Supplementary material for: Evaluation and Optimization of Paper-Based SERS Substrate for Potential Label-Free Raman Analysis of Seminal Plasma
Source: Hindawi journal article supplement (doi:10.1155/2017/4807064), 2017-01-01
Supplement: f1 [file 4807064.f1.pdf]

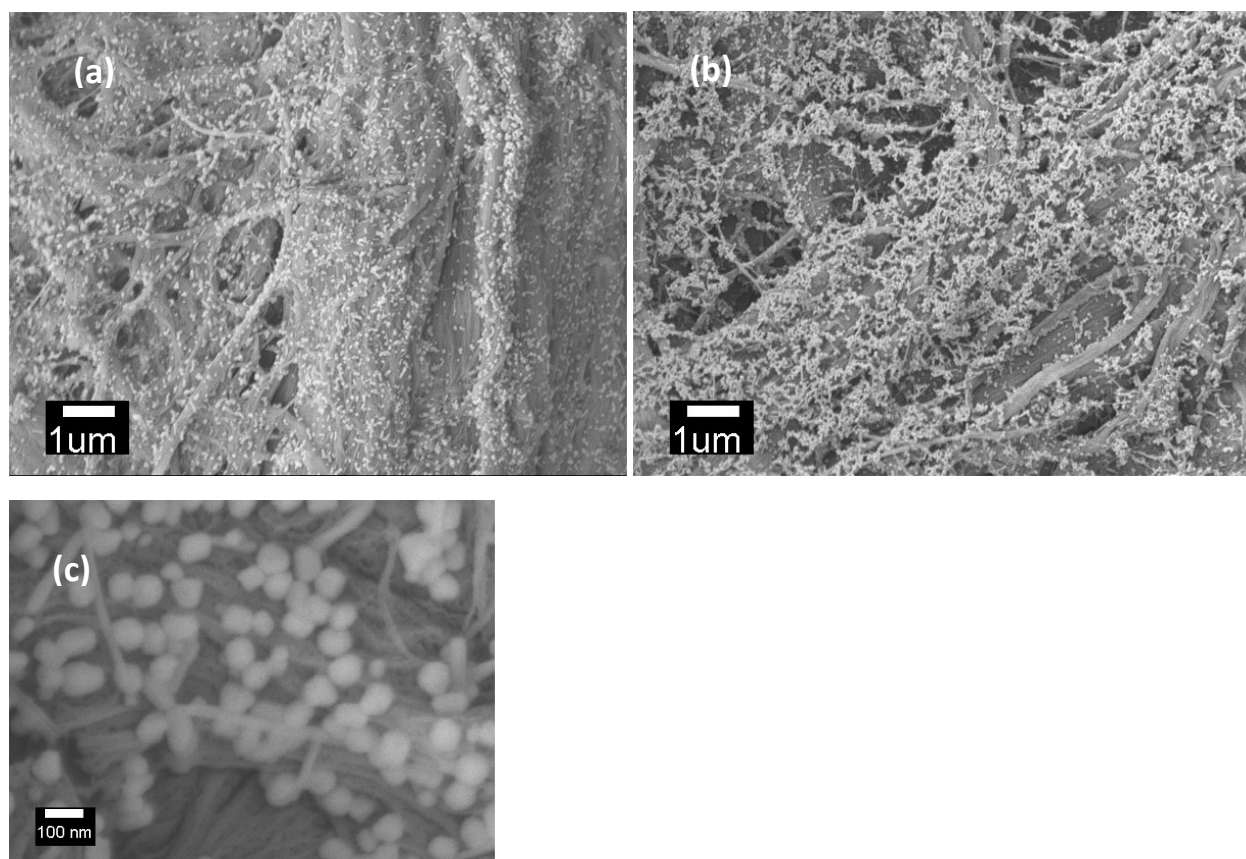

Fig. s1 Representative SEM images of AgNPs on paper substrate, treated with 20mM NaCl at 30min (a) and 4h (b), as well as the corresponding high magnification of dispersive AgNPs (c).

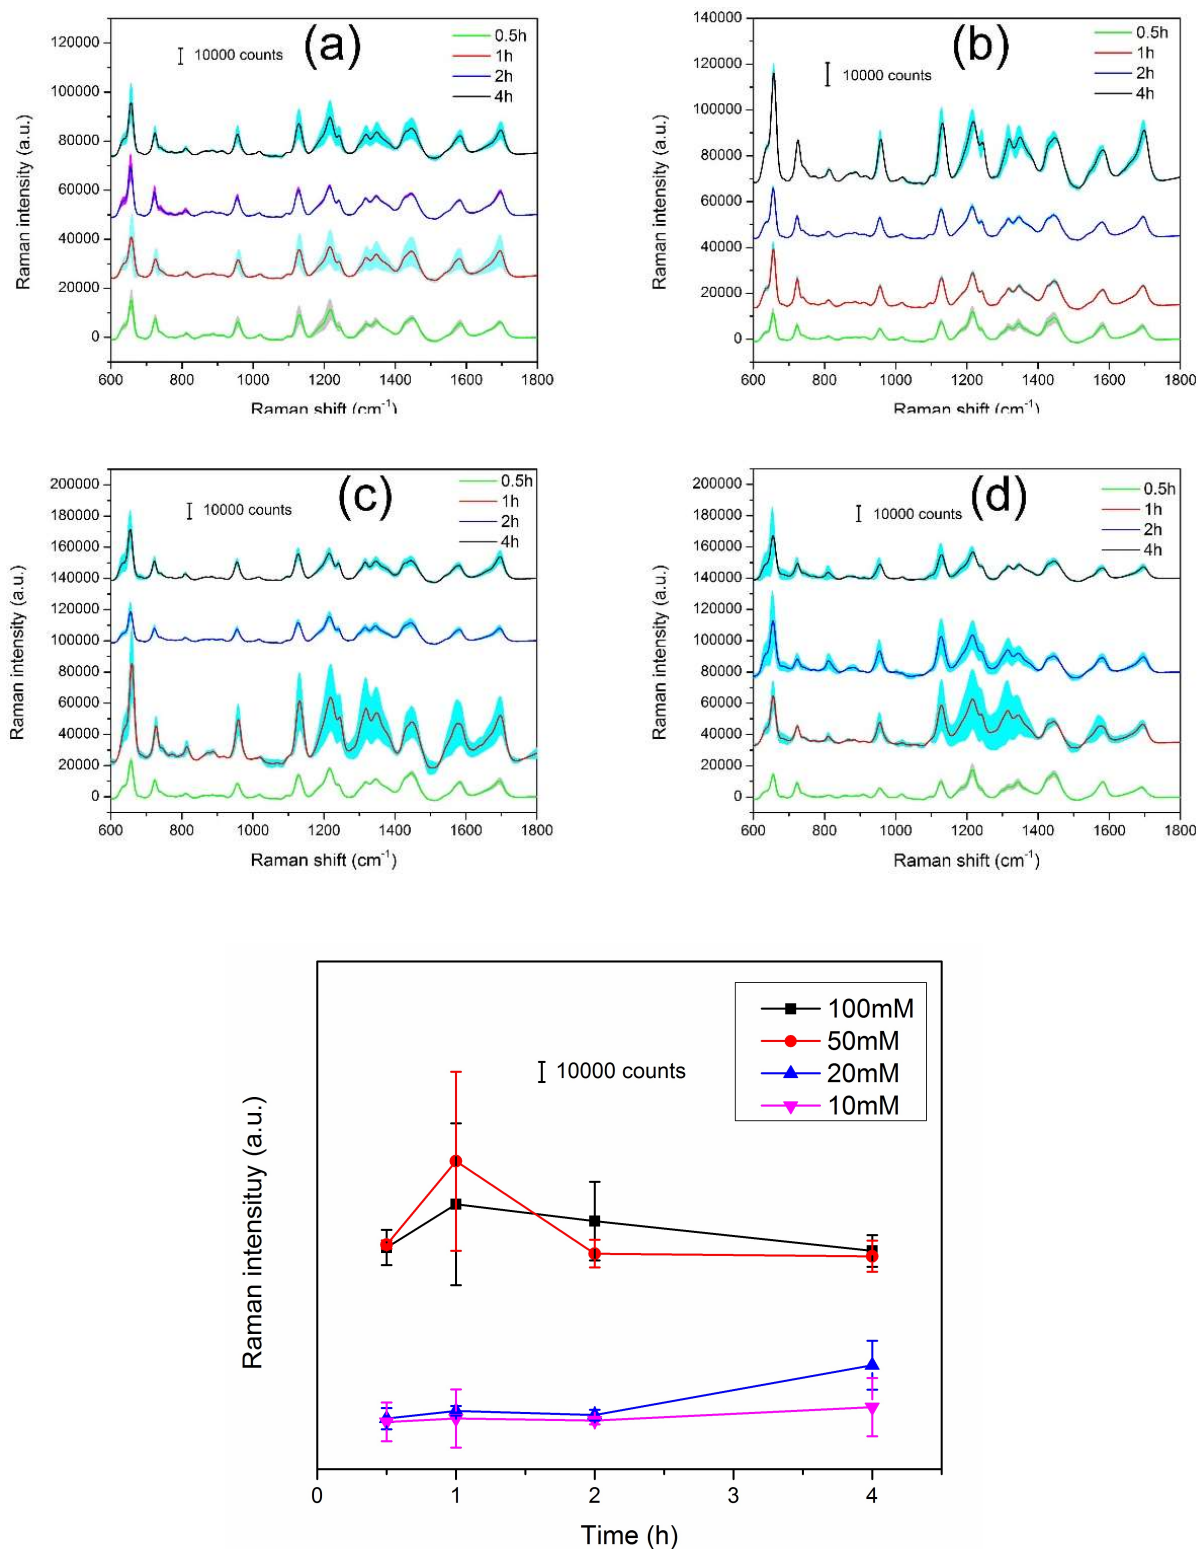

Fig. S2 SERS spectra of SP mixed with colloidal AgNPs for different periods of time (0.5, 1, 2 and 4h), under different NaCl concentrations: 10mM (a), 20mM (b), 50mM (c) and 100mM (d), as well as the intensity change of 1220cm<sup>-1</sup> peak over time, under different concentrations of NaCl.

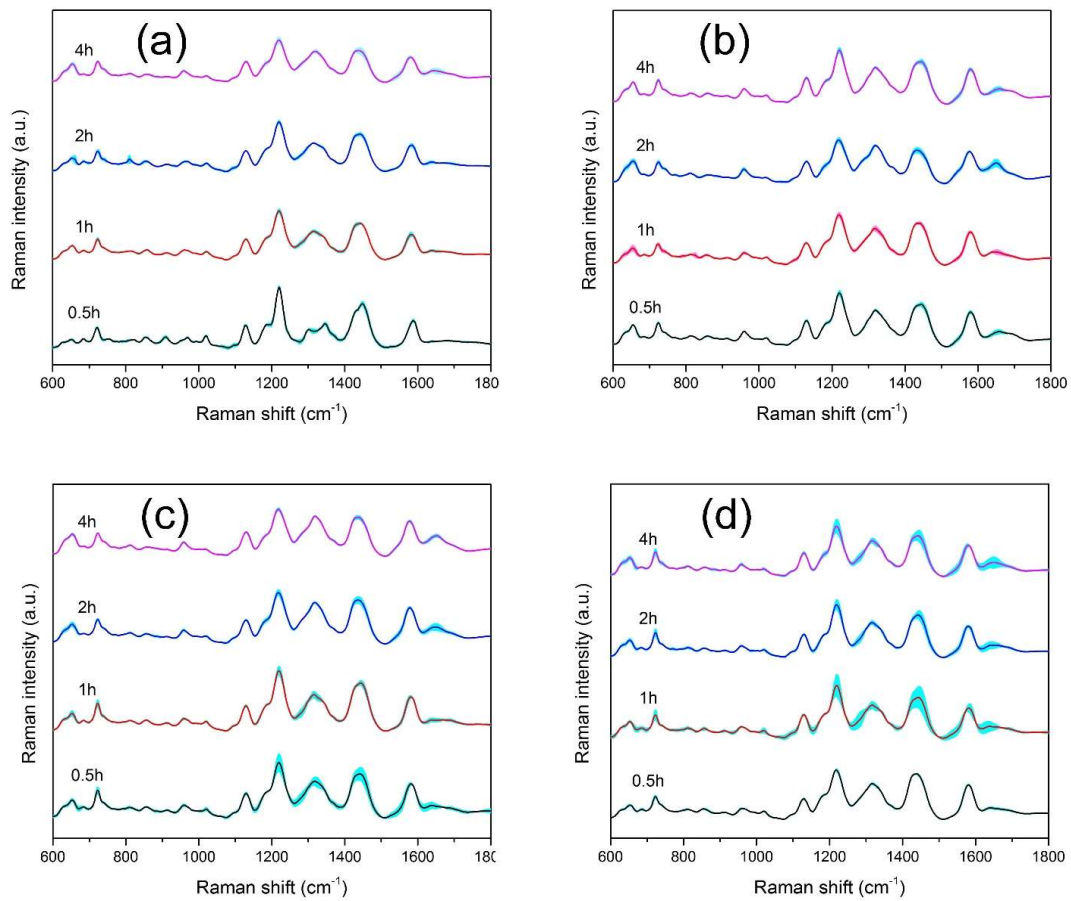

Fig. s3 SERS spectra of SP on paper substrate that soaked with colloidal AgNPs for different periods of time (0.5, 1, 2 and 4h), under different NaCl concentrations: 10mM (a), 20mM (b), 50mM (c) and 100mM (d).

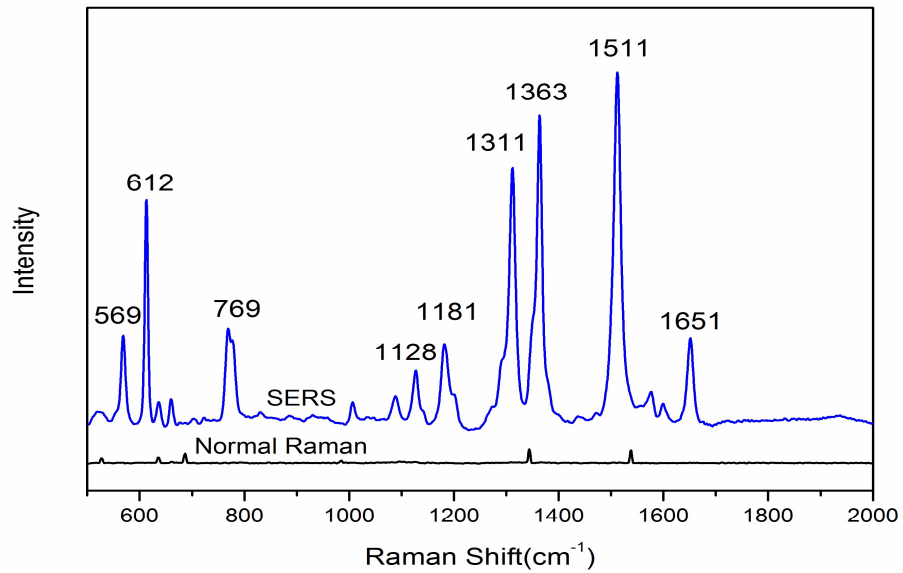

Fig. s4 Representative SERS (blue) and Raman spectra (black) of R6g, recorded at the concentrations of  $10^{-6}$  M and  $10^{-2}$  M, respectively.
